# Supplementary material for: Evaporation of sulfate aerosols at low relative humidity
Source: Copernicus journal article supplement (doi:10.5194/acp-17-8923-2017), 2017-07-25
Supplement: Supplementary file 1 [file acp-17-8923-2017-supplement.pdf]

Supplement of Atmos. Chem. Phys., 17, 8923–8938, 2017  
<https://doi.org/10.5194/acp-17-8923-2017-supplement>  
© Author(s) 2017. This work is distributed under  
the Creative Commons Attribution 3.0 License.

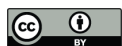

*Supplement of*

## **Evaporation of sulfate aerosols at low relative humidity**

**Georgios Tsagkogeorgas et al.**

*Correspondence to:* Georgios Tsagkogeorgas ([george.tsagkogeorgas@tropos.de](mailto:george.tsagkogeorgas@tropos.de))

The copyright of individual parts of the supplement might differ from the CC BY 3.0 License.

**Table S1. Coefficient of determination ( $R^2$ ) between the modelled and measured geometric mean diameter (GMD) for experiments 1, 2 and 3. Also the simulation number that we refer to in the text, the Case with the corresponding values for the equilibrium coefficients  $K_{H_2SO_4,288K}$  and  ${}^xK_{SO_3,288K}$ , the  $B_{H_2SO_4}$  and  $B_{SO_3}$  values (cf. Eq. 20) to describe the temperature dependence of  $K_{H_2SO_4}$  and  ${}^xK_{SO_3}$ , the assumed species composition of the particle contamination (Con.), and the source to the pure-liquid saturation vapour pressure parameterizations are given.**

| Exp. No. | Sim. No | Case | $B_{H_2SO_4}$ (K) | $B_{SO_3}$ (K) | $K_{H_2SO_4,288K}$ (mol.kg <sup>-1</sup> ) | ${}^xK_{SO_3,288K}$  | Con.            | Vap. pres.         | $R^2$ |
|----------|---------|------|-------------------|----------------|--------------------------------------------|----------------------|-----------------|--------------------|-------|
| 1        | 1       | a1   | 0                 | 0              | $2.00 \cdot 10^9$                          | $\infty$             | NH <sub>3</sub> | N-K-L,<br>Nickless | 0.994 |
| 1        | 2       | b2a  | 0                 | 0              | $2.40 \cdot 10^9$                          | $1.43 \cdot 10^{10}$ | NH <sub>3</sub> | N-K-L,<br>Nickless | 0.994 |
| 1        | 3       | c2b  | 0                 | 0              | $4.00 \cdot 10^9$                          | $1.54 \cdot 10^9$    | NH <sub>3</sub> | N-K-L,<br>Nickless | 0.996 |
| 1        | 4       | d3   | 0                 | 0              | $1.00 \cdot 10^{11}$                       | $3.33 \cdot 10^7$    | NH <sub>3</sub> | N-K-L,<br>Nickless | 0.992 |
| 1        | 5       | 1    | 0                 | 0              | **                                         | $\infty$             | Org.            | N-K-L,<br>Nickless | 0.992 |
| 1        | 6       | 2a   | 0                 | 0              | $2.40 \cdot 10^9$                          | $1.43 \cdot 10^{10}$ | Org.            | N-K-L,<br>Nickless | 0.995 |
| 1        | 7       | 2a   | 0                 | 0              | $2.40 \cdot 10^9$                          | $1.43 \cdot 10^{10}$ | DMA             | N-K-L,<br>Nickless | 0.993 |
| 1        | 8       | 1    | 0                 | 0              | $3.80 \cdot 10^9$                          | $\infty$             | NH <sub>3</sub> | ASPEN              | 0.990 |
| 1        | 9       | 2a   | 0                 | 0              | $4.00 \cdot 10^9$                          | $4.55 \cdot 10^{10}$ | NH <sub>3</sub> | ASPEN              | 0.993 |
| 1        | 10      | 2b   | 0                 | 0              | $5.00 \cdot 10^9$                          | $5.00 \cdot 10^9$    | NH <sub>3</sub> | ASPEN              | 0.995 |
| 1        | 11      | 3    | 0                 | 0              | $1.00 \cdot 10^{11}$                       | $5.00 \cdot 10^7$    | NH <sub>3</sub> | ASPEN              | 0.990 |
| 1        | 12      | 1    | 0                 | 0              | **                                         | $\infty$             | Org.            | ASPEN              | 0.888 |
| 2        | 13      | 1    | 0                 | 0              | $2.00 \cdot 10^9$                          | $\infty$             | NH <sub>3</sub> | N-K-L,<br>Nickless | 0.870 |
| 2        | 14      | 2a   | 0                 | 0              | $2.40 \cdot 10^9$                          | $1.43 \cdot 10^{10}$ | NH <sub>3</sub> | N-K-L,<br>Nickless | 0.869 |
| 2        | 15      | 2b   | 0                 | 0              | $4.00 \cdot 10^9$                          | $1.54 \cdot 10^9$    | NH <sub>3</sub> | N-K-L,<br>Nickless | 0.871 |
| 2        | 16      | 3    | 0                 | 0              | $1.00 \cdot 10^{11}$                       | $3.33 \cdot 10^7$    | NH <sub>3</sub> | N-K-L,<br>Nickless | 0.868 |
| 2        | 17      | 2a   | 0                 | 0              | $2.40 \cdot 10^9$                          | $1.43 \cdot 10^{10}$ | Org.            | N-K-L,<br>Nickless | 0.870 |
| 2        | 18      | 2a   | 0                 | 0              | $2.40 \cdot 10^9$                          | $1.43 \cdot 10^{10}$ | DMA             | N-K-L,<br>Nickless | 0.869 |
| 2        | 19      | 1    | 0                 | 0              | **                                         | $\infty$             | Org.            | N-K-L,<br>Nickless | 0.868 |
| 2        | 20      | 1    | 0                 | 0              | $3.80 \cdot 10^9$                          | $\infty$             | NH <sub>3</sub> | ASPEN              | 0.867 |
| 2        | 21      | 2a   | 0                 | 0              | $4.00 \cdot 10^9$                          | $4.55 \cdot 10^{10}$ | NH <sub>3</sub> | ASPEN              | 0.870 |
| 2        | 22      | 2b   | 0                 | 0              | $5.00 \cdot 10^9$                          | $5.00 \cdot 10^9$    | NH <sub>3</sub> | ASPEN              | 0.871 |
| 2        | 23      | 3    | 0                 | 0              | $1.00 \cdot 10^{11}$                       | $5.00 \cdot 10^7$    | NH <sub>3</sub> | ASPEN              | 0.867 |
| 2        | 24      | 1    | 0                 | 0              | **                                         | $\infty$             | Org.            | ASPEN              | 0.510 |
| 3        | 25      | 1    | 0                 | 0              | $2.00 \cdot 10^9$                          | $\infty$             | NH <sub>3</sub> | N-K-L,<br>Nickless | 0.841 |
| 3        | 26      | 1    | 0                 | 0              | $2.00 \cdot 10^9$                          | $\infty$             | Org.            | N-K-L,<br>Nickless | 0.905 |

|   |    |    |       |          |                       |                       |                 |                    |       |
|---|----|----|-------|----------|-----------------------|-----------------------|-----------------|--------------------|-------|
| 3 | 27 | 1  | 3475* | 0        | 2.00·10 <sup>9</sup>  | ∞                     | NH <sub>3</sub> | N–K–L,<br>Nickless | 0.534 |
| 3 | 28 | 1  | 0     | 0        | **                    | ∞                     | Org.            | N–K–L,<br>Nickless | 0.967 |
| 3 | 29 | 2a | 3475* | 14245.7* | 2.40·10 <sup>9</sup>  | 1.43·10 <sup>10</sup> | NH <sub>3</sub> | N–K–L,<br>Nickless | 0.611 |
| 3 | 30 | 2a | 3475* | 0        | 2.40·10 <sup>9</sup>  | 1.43·10 <sup>10</sup> | NH <sub>3</sub> | N–K–L,<br>Nickless | 0.825 |
| 3 | 31 | 2a | 3475* | –10000   | 2.40·10 <sup>9</sup>  | 1.43·10 <sup>10</sup> | NH <sub>3</sub> | N–K–L,<br>Nickless | 0.992 |
| 3 | 32 | 2a | 0     | 14245.7* | 2.40·10 <sup>9</sup>  | 1.43·10 <sup>10</sup> | NH <sub>3</sub> | N–K–L,<br>Nickless | 0.839 |
| 3 | 33 | 2a | 0     | 0        | 2.40·10 <sup>9</sup>  | 1.43·10 <sup>10</sup> | NH <sub>3</sub> | N–K–L,<br>Nickless | 0.981 |
| 3 | 34 | 2a | 0     | 0        | 2.40·10 <sup>9</sup>  | 1.43·10 <sup>10</sup> | Org.            | N–K–L,<br>Nickless | 0.991 |
| 3 | 35 | 2a | 0     | –10000   | 2.40·10 <sup>9</sup>  | 1.43·10 <sup>10</sup> | NH <sub>3</sub> | N–K–L,<br>Nickless | 0.860 |
| 3 | 36 | 2a | 0     | –3000    | 2.40·10 <sup>9</sup>  | 1.43·10 <sup>10</sup> | NH <sub>3</sub> | N–K–L,<br>Nickless | 0.993 |
| 3 | 37 | 2b | 3475* | 14245.7* | 4.00·10 <sup>9</sup>  | 1.54·10 <sup>9</sup>  | NH <sub>3</sub> | N–K–L,<br>Nickless | 0.937 |
| 3 | 38 | 2b | 3475* | 0        | 4.00·10 <sup>9</sup>  | 1.54·10 <sup>9</sup>  | NH <sub>3</sub> | N–K–L,<br>Nickless | 0.819 |
| 3 | 39 | 2b | 3475* | – 10000  | 4.00·10 <sup>9</sup>  | 1.54·10 <sup>9</sup>  | NH <sub>3</sub> | N–K–L,<br>Nickless | 0.458 |
| 3 | 40 | 2b | 3475* | 5000     | 4.00·10 <sup>9</sup>  | 1.54·10 <sup>9</sup>  | NH <sub>3</sub> | N–K–L,<br>Nickless | 0.918 |
| 3 | 41 | 2b | 0     | 14245.7* | 4.00·10 <sup>9</sup>  | 1.54·10 <sup>9</sup>  | NH <sub>3</sub> | N–K–L,<br>Nickless | 0.953 |
| 3 | 42 | 2b | 0     | 0        | 4.00·10 <sup>9</sup>  | 1.54·10 <sup>9</sup>  | NH <sub>3</sub> | N–K–L,<br>Nickless | 0.685 |
| 3 | 43 | 2b | 0     | – 10000  | 4.00·10 <sup>9</sup>  | 1.54·10 <sup>9</sup>  | NH <sub>3</sub> | N–K–L,<br>Nickless | 0.260 |
| 3 | 44 | 3  | 3475* | 14245.7* | 1.00·10 <sup>11</sup> | 3.33·10 <sup>7</sup>  | NH <sub>3</sub> | N–K–L,<br>Nickless | 0.903 |
| 3 | 45 | 3  | 3475* | 0        | 1.00·10 <sup>11</sup> | 3.33·10 <sup>7</sup>  | NH <sub>3</sub> | N–K–L,<br>Nickless | 0.571 |
| 3 | 46 | 3  | 3475* | – 10000  | 1.00·10 <sup>11</sup> | 3.33·10 <sup>7</sup>  | NH <sub>3</sub> | N–K–L,<br>Nickless | 0.146 |
| 3 | 47 | 3  | 0     | 14245.7* | 1.00·10 <sup>11</sup> | 3.33·10 <sup>7</sup>  | NH <sub>3</sub> | N–K–L,<br>Nickless | 0.898 |
| 3 | 48 | 3  | 0     | 0        | 1.00·10 <sup>11</sup> | 3.33·10 <sup>7</sup>  | NH <sub>3</sub> | N–K–L,<br>Nickless | 0.420 |
| 3 | 49 | 3  | 0     | – 10000  | 1.00·10 <sup>11</sup> | 3.33·10 <sup>7</sup>  | NH <sub>3</sub> | N–K–L,<br>Nickless | 0.138 |
| 3 | 50 | 1  | 0     | 0        | 3.80·10 <sup>9</sup>  | ∞                     | NH <sub>3</sub> | ASPEN              | 0.991 |
| 3 | 51 | 2a | 0     | 0        | 4.00·10 <sup>9</sup>  | 4.55·10 <sup>10</sup> | NH <sub>3</sub> | ASPEN              | 0.992 |
| 3 | 52 | 2b | 0     | 0        | 5.00·10 <sup>9</sup>  | 5.00·10 <sup>9</sup>  | NH <sub>3</sub> | ASPEN              | 0.880 |
| 3 | 53 | 3  | 0     | 0        | 1.00·10 <sup>11</sup> | 5.00·10 <sup>7</sup>  | NH <sub>3</sub> | ASPEN              | 0.540 |

\* Values from Que et al. (2011).

\*\* Simulation with the H<sub>2</sub>SO<sub>4</sub> activity derived from Eq. (15) using the thermodynamic data from Giauque et al. (1960)

<sup>a</sup> Case 1: Only evaporation of H<sub>2</sub>SO<sub>4</sub>.

<sup>b</sup> Case 2a: Both H<sub>2</sub>SO<sub>4</sub> and SO<sub>3</sub> evaporate from the particles. H<sub>2</sub>SO<sub>4</sub> is the main evaporating species at  $T=288.8$  K.

<sup>c</sup> Case 2b: Both H<sub>2</sub>SO<sub>4</sub> and SO<sub>3</sub> evaporate from the particles. SO<sub>3</sub> is the main evaporating species at  $T=288.8$  K.

<sup>d</sup> Case 3: SO<sub>3</sub> is completely dominating the evaporation.

5

10

15

20

25

30

## S1 AMS measurements

The evaporation of sulphate particles based on AMS measurements (Fig. S1 (a)) showed that the particles were composed almost exclusively of sulphuric acid. Calculations of the kappa value  $\kappa$ , based on the AMS measurements, yield a value close to the  $\kappa$  for pure sulphuric acid particles (see Fig. S2).

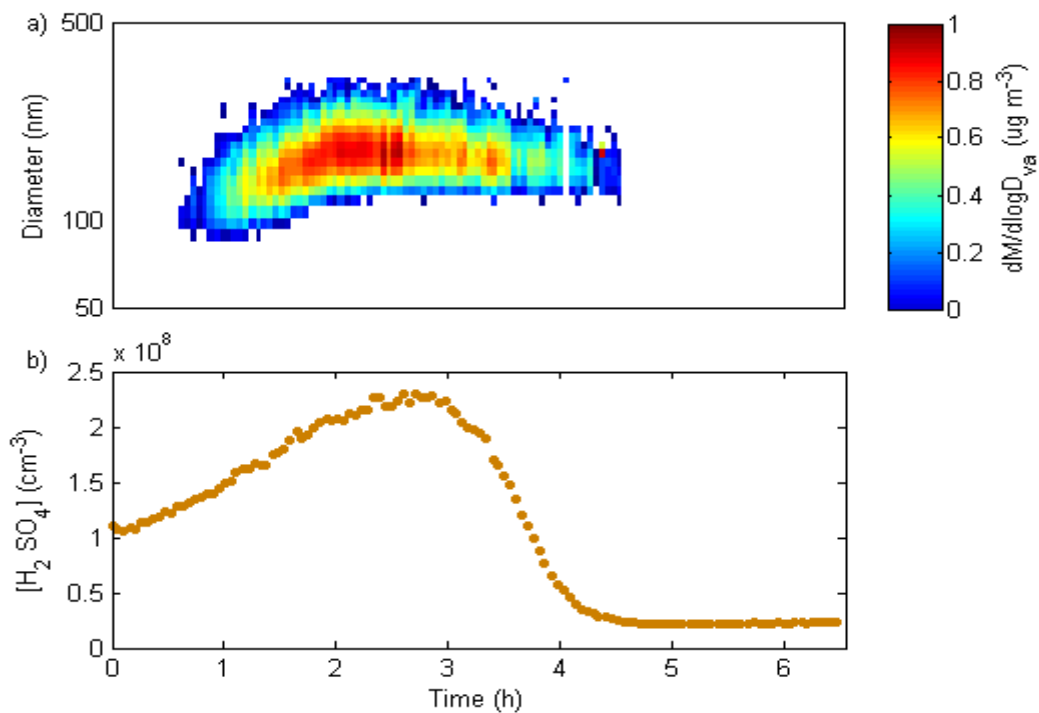

5

**Figure S1.** (a) Sulphate mass size distribution  $\mu\text{g}\cdot\text{m}^{-3}$  (from AMS data) and (b) gas-phase  $\text{H}_2\text{SO}_4$  concentration (from CIMS data) increases until reaches a peak value during the aerosol particle evaporation experiment 2 performed at  $T=288.8$  K.

10

15

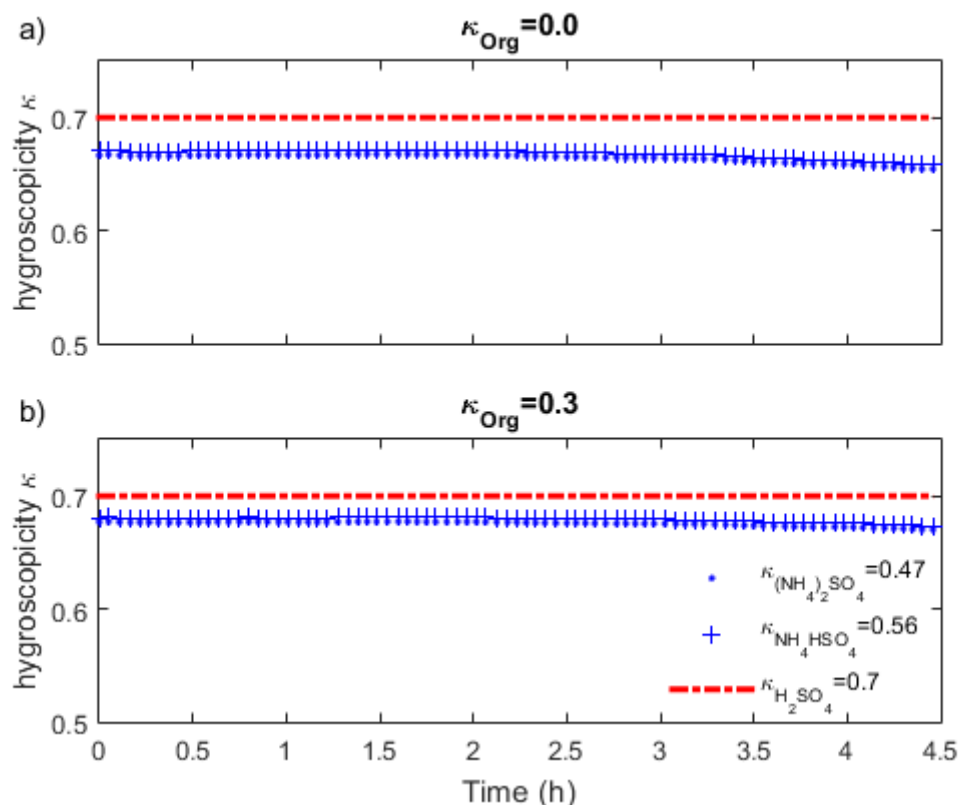

5 Figure S2. Hygroscopicity kappa ( $\kappa$ ), based on the AMS measurements, of mixed particles as a function of time for experiment 3.  $\kappa$  derived from the hygroscopicities of the components (assumed the lower and higher  $\kappa$  values for bases like ammonium sulphate,  $\kappa_{(NH_4)_2SO_4} = 0.47$  and ammonium bisulfate,  $\kappa_{NH_4HSO_4} = 0.56$  (Topping et al., 2005; Petters and Kreidenweis 2007), and organics with  $O:C=0$ ,  $\kappa_{Org}=0.0$  and  $O:C=1$ ,  $\kappa_{Org}=0.3$  (Massoli et al., 2010)) and their respective volume fractions by applying the Zdanovskii–Stokes–Robinson (ZSR) mixing rule. For the calculation of the volume concentration of each compound assumed liquid phase density of  $SO_4$ ,  $NH_4$ ,  $NO_3$ ,  $Chl$ ,  $Org$  constituents (<http://cires1.colorado.edu/jimenez-group/wiki>). The difference in percentage of  $\kappa$  values calculated for the two extreme cases of  $\kappa_{(NH_4)_2SO_4} = 0.47$ ,  $\kappa_{NH_4HSO_4} = 0.56$  is 0.4 %, while for  $\kappa_{Org}=0.0$  and  $\kappa_{Org}=0.3$  is 1 %. The result shows a  $\kappa$  very close to that of pure sulphuric acid (Sullivan et al., 2010).

10

15

## S2 Mole fraction based activity coefficients of H<sub>2</sub>SO<sub>4</sub> and SO<sub>3</sub> and water activity

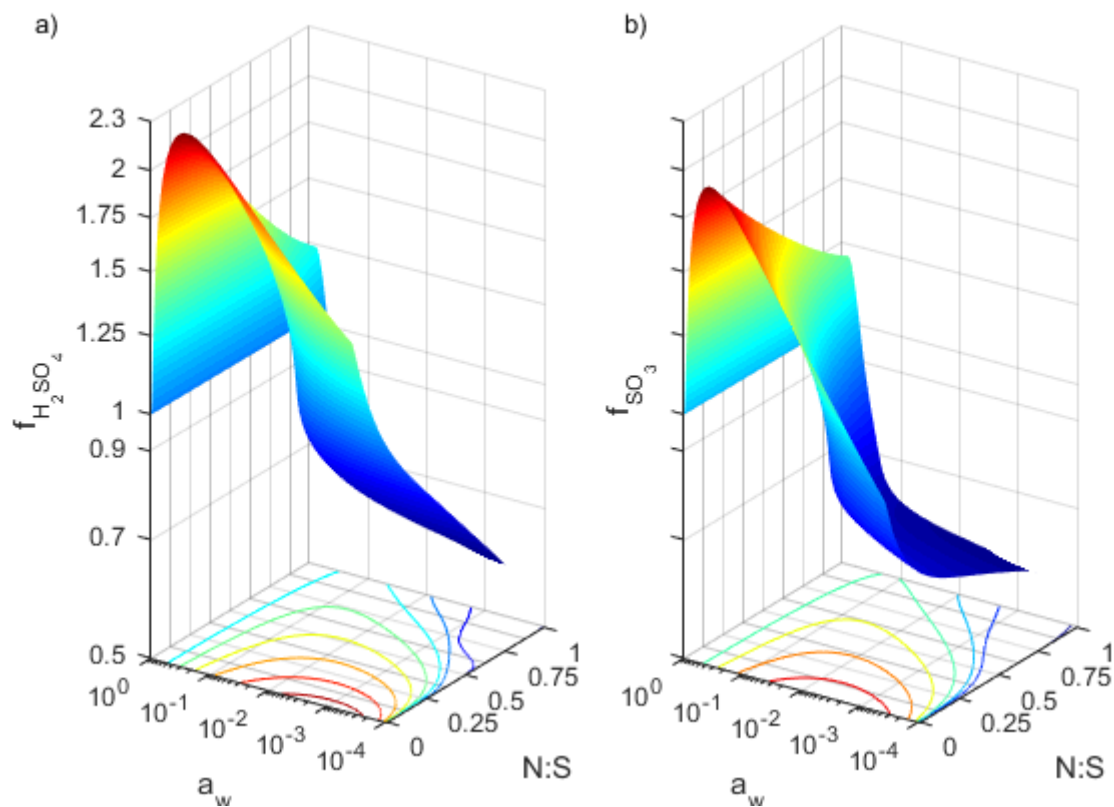

Figure S3. Modelled mole fraction based activity coefficient of (a) H<sub>2</sub>SO<sub>4</sub> ( $f_{H_2SO_4}$ ) with equilibrium constant  $K_{H_2SO_4}=2.40 \cdot 10^9 \text{ mol} \cdot \text{kg}^{-1}$ , and (b) SO<sub>3</sub> ( $f_{SO_3}$ ) with equilibrium constant  ${}^xK_{SO_3}=1.43 \cdot 10^{10}$ , at  $T=288.8 \text{ K}$ , as a function of the water activity,  $a_w$ , on the y-axis and N:S on the x-axis. The colour coded contours on x-y axes represent constant activity coefficient for a)  $f_{H_2SO_4}=0.8-2.2$  and b)  $f_{SO_3}=0.8-1.8$ .

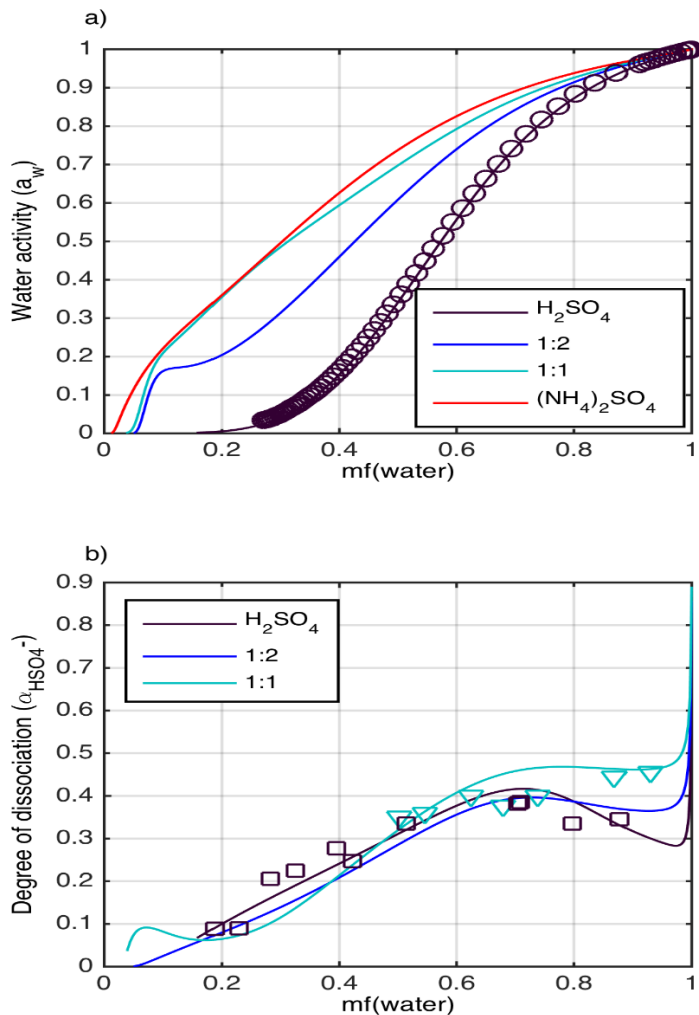

Figure S4. (a) Modelled water activity curves and (b) degree of dissociation of  $HSO_4^-$  as a function of water mass fraction in aqueous solutions of  $H_2SO_4$  and mixtures of  $(NH_4)_2SO_4$  and  $H_2SO_4$ . The model simulations and measurements were performed at 298 K. The modelled water activity curves are lines colour coded. The purple curve corresponds to pure sulphuric acid, blue and cyan curves to 1:2 and 1:1 molar ratio of  $(NH_4)_2SO_4:H_2SO_4$  and red curve to pure ammonium sulphate. The measured water activity curve is symbol coded. The purple circle symbol corresponds to  $H_2SO_{4(aq)}$  (Staples 1981). (b) the modelled degree of dissociation,  $\alpha_{HSO_4^-}$ , curves are lines colour coded (corresponding to same aqueous solutions as the curves in Fig. (S4 (a))). The measured degree of dissociation is symbol colour coded (purple squares corresponds to  $H_2SO_{4(aq)}$ , Myhre et al. (2003), cyan triangles to the 1:1  $(NH_4)_2SO_4:H_2SO_4$  mixture, Dawson et al. (1986)). The model results can be compared with analogous results in Fig. 10 from Zuend et al., 2011.



### S3 Saturation vapour pressure parameterizations

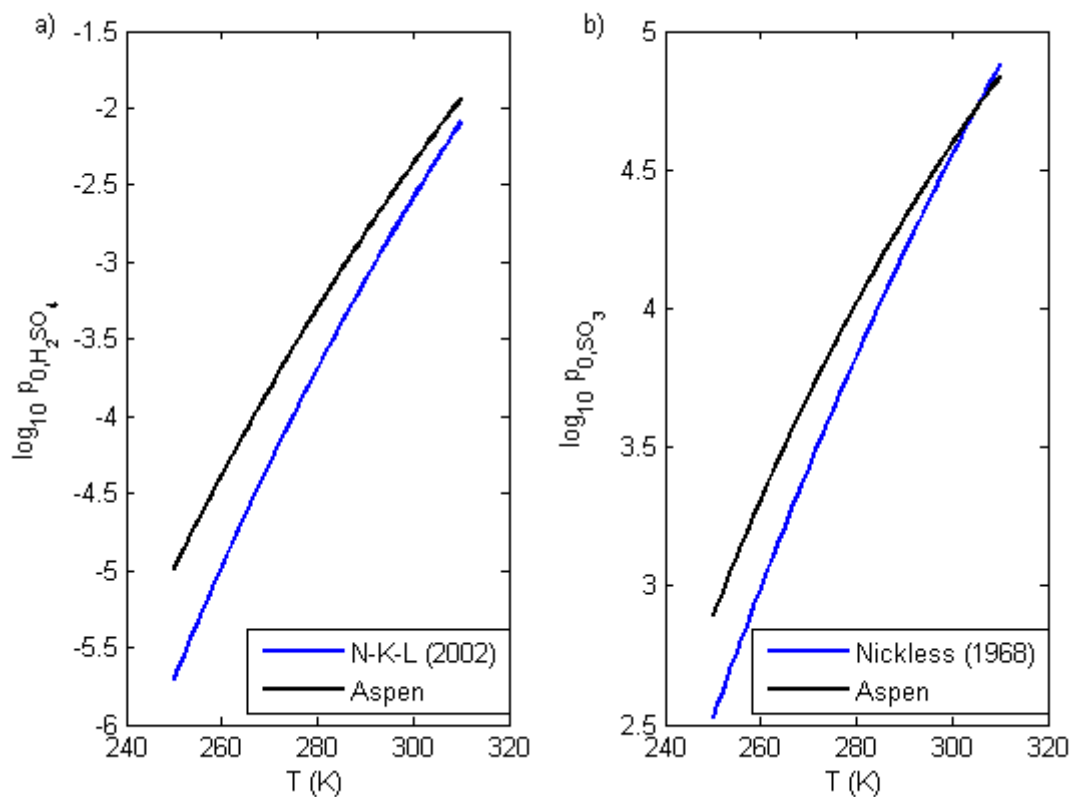

5 **Figure S5. Saturation vapour pressures for  $\text{H}_2\text{SO}_4$  and  $\text{SO}_3$ . Comparison among two different pure liquid saturation vapour pressure parameterizations (a) for  $\text{H}_2\text{SO}_4$  and (b) for  $\text{SO}_3$ . In panel (a) the blue curve corresponds to the parameterization from the work of Kulmala and Laaksonen (1990), which was optimized by Noppel et al., 2002 (N–K–L parameterization), Eq. (11). The black curve corresponds to the parameterization from Que et al., 2011 (original Aspen Plus Databank). In panel (b) the blue curve corresponds to the parameterization from the work of Nickless (1968), Eq. (12) and the black curve to the parameterization from Que et al., 2011 (original Aspen Plus Databank).**

## S4 The Kelvin effect

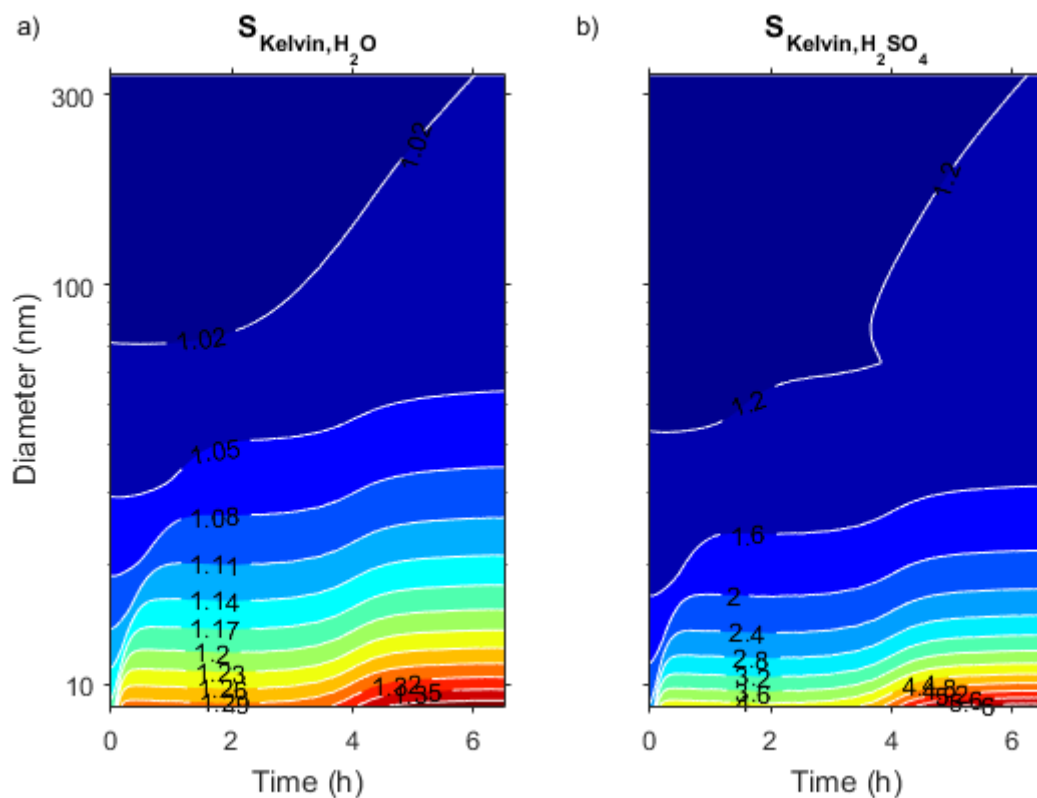

5 Figure S6. The Kelvin effect for experiment 2 at  $T=288.8$  K for Case 2a ( $K_{\text{H}_2\text{SO}_4}=2.40 \cdot 10^9$  mol $\cdot$ kg $^{-1}$  and  $x_{\text{K}_{2}\text{O}_3}=1.43 \cdot 10^{10}$ ) illustrates the increase in (a) water (white contours correspond to the Kelvin terms  $S_{\text{Kelvin}, \text{H}_2\text{O}}=1.02-1.38$ ) and (b)  $\text{H}_2\text{SO}_4$  (white contours represent the Kelvin terms  $S_{\text{Kelvin}, \text{H}_2\text{SO}_4}=1.2-6.0$ ) saturation vapour pressures. The minimum particle size diameter for experiment 2 is  $\sim 40$  nm, so the maximum value of the Kelvin term is  $\sim 1.44$  for sulphuric acid.

## S5 Saturation concentration of H<sub>2</sub>SO<sub>4</sub> and SO<sub>3</sub>

We can calculate the saturation concentration of H<sub>2</sub>SO<sub>4</sub> ( $C_{H_2SO_4,S}$ , Eq. S1) and SO<sub>3</sub> ( $C_{SO_3,S}$ , Eq. S2) in  $\mu\text{g}\cdot\text{m}^{-3}$  (Fig. S7) with the H<sub>2</sub>SO<sub>4</sub> dissociation equilibrium coefficients,  $K_{H_2SO_4}=2.4\cdot 10^9 \text{ mol}\cdot\text{kg}^{-1}$ , and  ${}^xK_{SO_3}=1.43\cdot 10^{10}$ , based on the mole fractions (Fig. 2), the modelled mole fraction based activity coefficients (Fig. S3), the pure liquid saturation vapours pressure parameterizations, Eq. (11) and (12), and the Kelvin effect, Eq. (14).

$$C_{H_2SO_4,S} = \frac{P_{0,H_2SO_4} \cdot x_{H_2SO_4} \cdot f_{H_2SO_4} \cdot C_{k,H_2SO_4}}{R \cdot T \cdot M_{H_2SO_4}} \quad (\text{S1})$$

$$C_{SO_3,S} = \frac{P_{0,SO_3} \cdot x_{SO_3} \cdot f_{SO_3} \cdot C_{k,SO_3}}{R \cdot T \cdot M_{SO_3}} \quad (\text{S2})$$

For almost dry conditions ( $a_w=3.7\cdot 10^{-4}$ ) and  $N:S=0$ ,  $C_{H_2SO_4,S}\approx 2.6 \mu\text{g}\cdot\text{m}^{-3}$  and  $C_{SO_3,S}\approx 8.8 \mu\text{g}\cdot\text{m}^{-3}$ . However, as long as  $a_w$  is larger than  $1.3\cdot 10^{-3}$ ,  $C_{H_2SO_4,S}$  becomes larger than  $C_{SO_3,S}$ . Thus, for the conditions during the experiments ( $RH>0.3\%$ ) this thermodynamic setup can be categorized as Case 2a.

With the Aspen Plus Databank pure–liquid saturation vapour pressure parameterization and  $K_{H_2SO_4}=4.00\cdot 10^9 \text{ mol}\cdot\text{kg}^{-1}$  and  ${}^xK_{SO_3}=4.55\cdot 10^{10}$   $C_{H_2SO_4,S}$  is always higher than  $C_{SO_3,S}$  ( $C_{H_2SO_4,S}=3.33 \mu\text{g}\cdot\text{m}^{-3}$  and  $C_{SO_3,S}=2.28 \mu\text{g}\cdot\text{m}^{-3}$  at  $a_w=2\cdot 10^{-4}$  and  $N:S=0$ ). Thus, this model setup can be also classified as Case 2a.

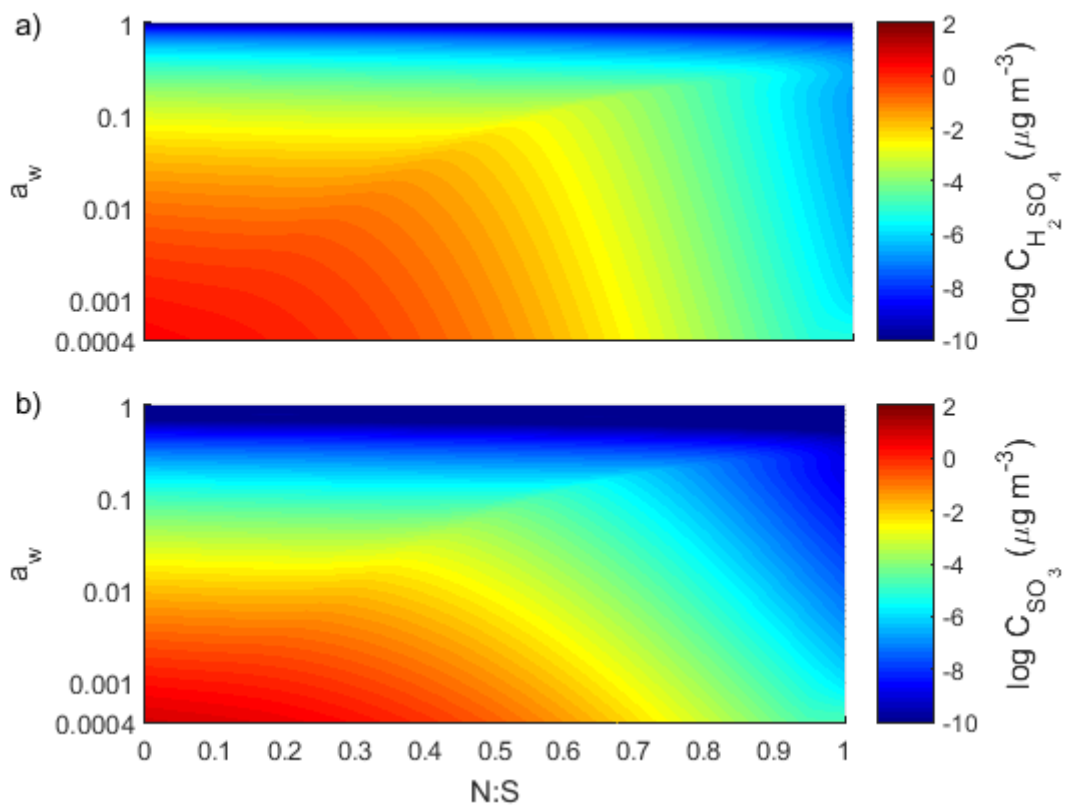

Figure S7.I. (a) The saturation concentration of  $\text{H}_2\text{SO}_4$  ( $C_{\text{H}_2\text{SO}_4,S}$ ) and (b)  $\text{SO}_3$  ( $C_{\text{SO}_3,S}$ ) in  $\mu\text{g}\cdot\text{m}^{-3}$  as a function of  $a_w$  and N:S at  $T=288.8$  K. The  $\text{H}_2\text{SO}_4$  dissociation equilibrium coefficients are  $K_{\text{H}_2\text{SO}_4}=2.4\cdot 10^9$   $\text{mol}\cdot\text{kg}^{-1}$ , and  ${}^xK_{\text{SO}_3}=1.43\cdot 10^{10}$ . For the  $\text{H}_2\text{SO}_4$  and  $\text{SO}_3$  pure liquid saturation vapour pressures are used the N–K–L, Eq. (11) and Nickless, Eq. (12) parameterisations, respectively.

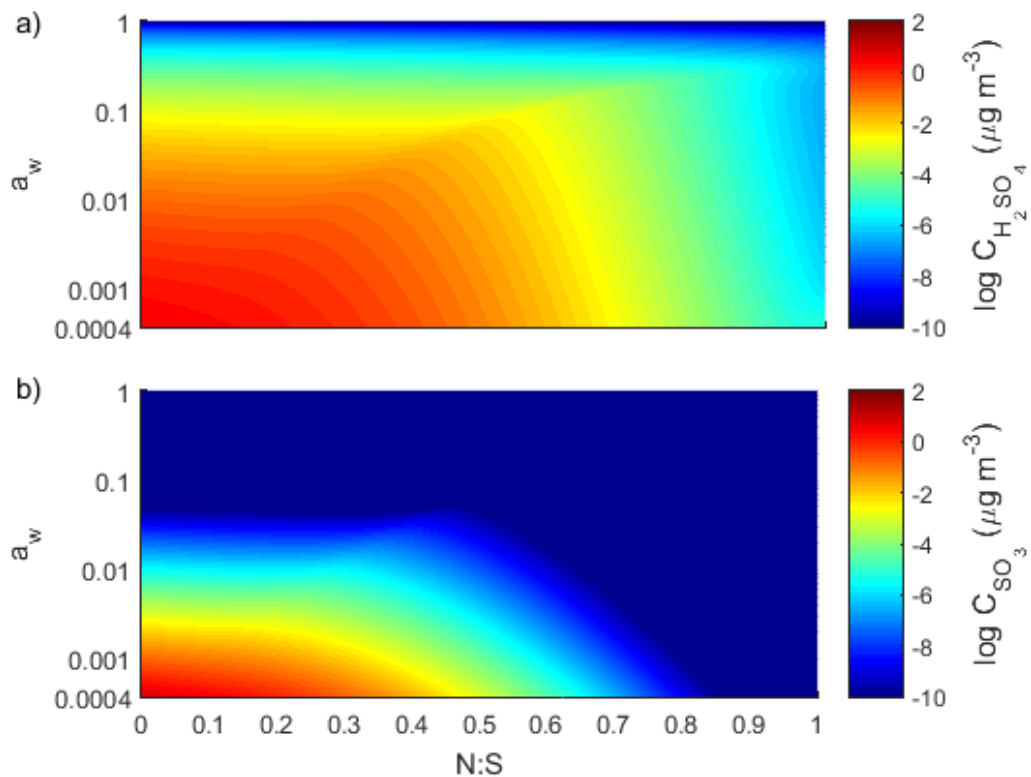

Figure S7.II. (a) The saturation concentration of H<sub>2</sub>SO<sub>4</sub> ( $C_{H_2SO_4,s}$ ) and (b) SO<sub>3</sub> ( $C_{SO_3,s}$ ) in  $\mu\text{g}\cdot\text{m}^{-3}$  as a function of  $a_w$  and N:S at  $T=288.8$  K. The H<sub>2</sub>SO<sub>4</sub> dissociation equilibrium coefficients are  $K_{H_2SO_4}=4.00\cdot 10^9 \text{ mol kg}^{-1}$ , and  ${}^xK_{SO_3}=4.55\cdot 10^{10}$ . For the H<sub>2</sub>SO<sub>4</sub> and SO<sub>3</sub> pure liquid saturation vapour pressures are used parameterisations from Que *et al.* (2011) (originally from the Aspen Plus Databank).

5

10

15

## S6 Geometrical mean diameter (GMD)

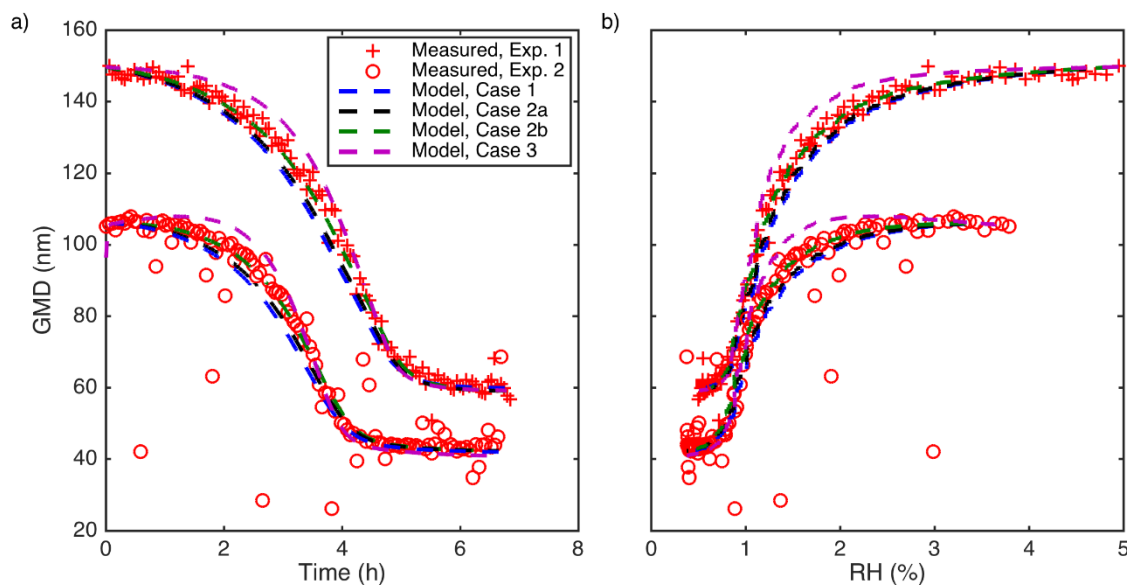

5 **Figure S8.** Measured and modelled GMD evolution as a function of (a) time and (b) RH for experiments 1 and 2 performed at  $T=288.8$  K. The modelled particles are composed of S(VI), H<sub>2</sub>O and NH<sub>3</sub> as a particle phase contaminant. The simulations correspond to Case 1 with H<sub>2</sub>SO<sub>4</sub> being the only evaporating S(VI) species,  $K_{H_2SO_4}=3.80\cdot 10^9$  mol·kg<sup>-1</sup>, Case 2a with H<sub>2</sub>SO<sub>4</sub> being the dominating evaporating S(VI) species,  $K_{H_2SO_4}=4.00\cdot 10^9$  mol·kg<sup>-1</sup> and  $^xK_{SO_3}=4.55\cdot 10^{10}$ , Case 2b with SO<sub>3</sub> being the dominating evaporating S(VI) species,  $K_{H_2SO_4}=5.00\cdot 10^9$  mol·kg<sup>-1</sup> and  $^xK_{SO_3}=5.00\cdot 10^9$  and Case 3 with SO<sub>3</sub> being the only evaporating S(VI) species,  $K_{H_2SO_4}=1.00\cdot 10^{11}$  mol·kg<sup>-1</sup> and  $^xK_{SO_3}=5.00\cdot 10^7$  (see Supplement, Table S1, simulations 8–11 and 20–23). The pure liquid saturation vapour pressures of H<sub>2</sub>SO<sub>4</sub> and SO<sub>3</sub> are calculated with parameterizations from Que *et al.* (2011) (originally from the Aspen Plus Databank).

10

15

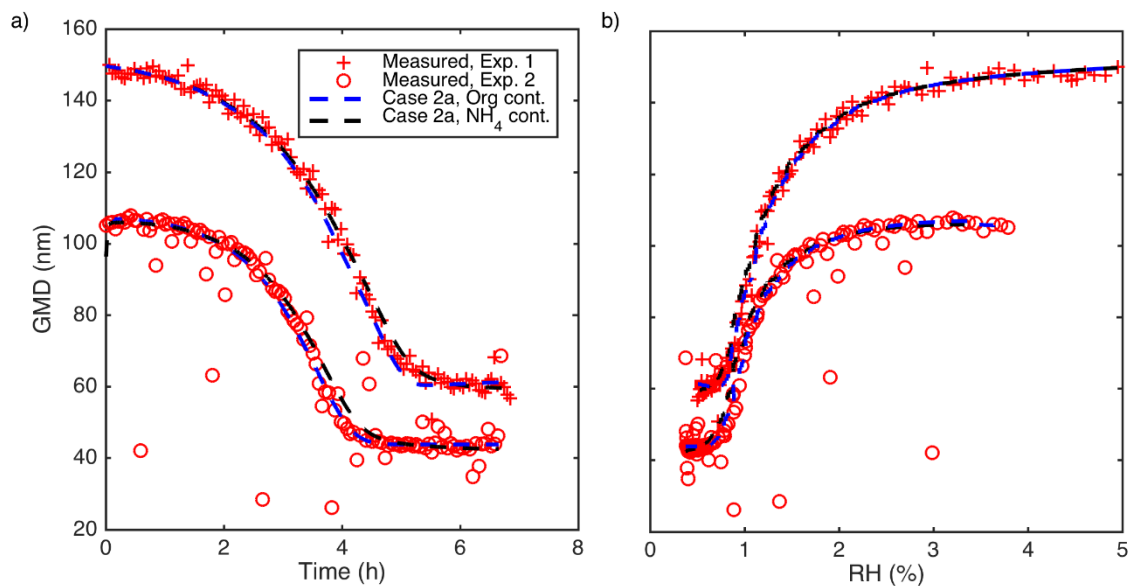

5 **Figure S9.** Measured and modelled GMD evolution as a function of (a) time and (b) RH for experiments 1 and 2 performed at  $T=288.8$  K. The modelled particles are composed of S(VI), H<sub>2</sub>O and either NH<sub>3</sub> or non-volatile, non-water-soluble organics as a particle phase contaminant for Case 2a,  $K_{H_2SO_4}=2.40 \cdot 10^9$  mol·kg<sup>-1</sup> and  $^xK_{SO_3}=1.43 \cdot 10^{10}$  (see Supplement, Table S1, simulation 2, 6, 14 and 17). The pure liquid saturation vapour pressures of H<sub>2</sub>SO<sub>4</sub> and SO<sub>3</sub> are taken from N-K-L, Eq. (11) and Nickless, Eq. (12) parameterizations, respectively.

10

15

20

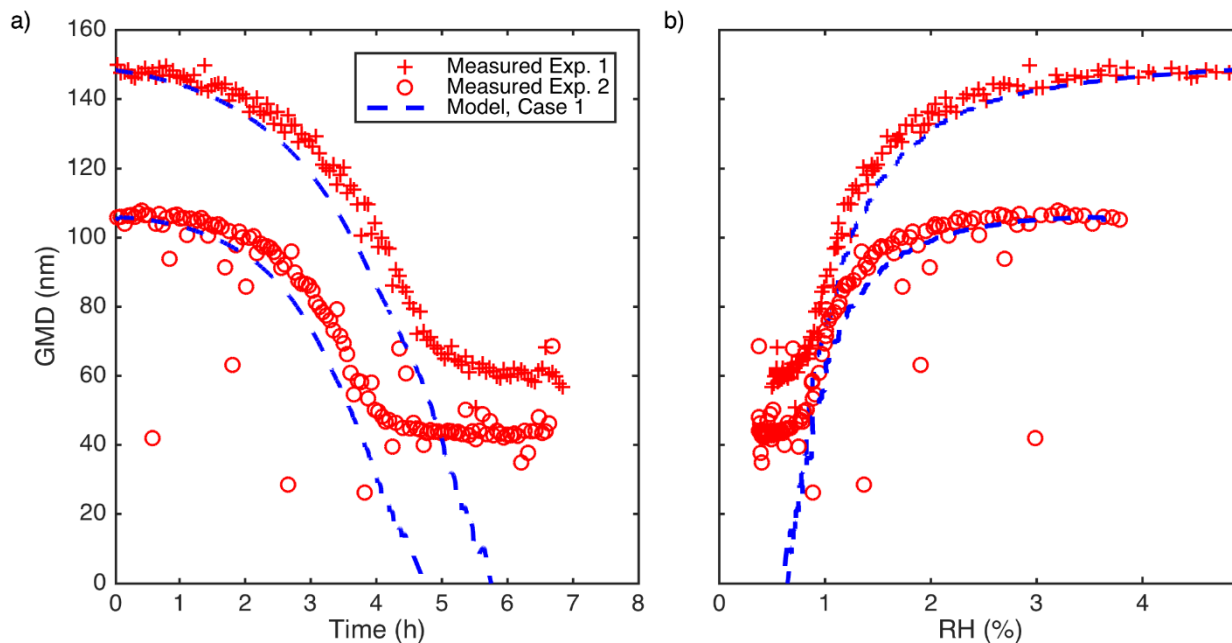

**Figure S10. Modelled and measured GMD evolution as a function of (a) time and (b) RH for experiments 1 and 2 performed at  $T=288.8$  K. The model results presented arise from Case 1 ( $K_{H_2SO_4}=2.00 \cdot 10^9 \text{ mol} \cdot \text{kg}^{-1}$ ) without any particle phase contaminant. The pure liquid saturation vapour pressure of  $H_2SO_4$  is calculated with Eq. (11), N-K-L parameterisation.**

5

10

15



Figure S11 compares the modelled and measured GMD evolution for experiments 1 and 2 performed at  $T=288.8$  K when we use the data from Giauque et al. (1960) and Eq. (15) to derive the  $\text{H}_2\text{SO}_4$  activity.  $\text{H}_2\text{SO}_4$  is assumed to be the only evaporating S(VI) species (Case 1), the particle phase contamination consists of non-volatile non-water-soluble organics, and the pure-liquid saturation vapour pressure of  $\text{H}_2\text{SO}_4$  is calculated with Eq. (11) or with the Aspen Plus Databank parameterization (see Supplement, Table S1, simulations 5, 12, 19 and 24 in Table 2). The modelled GMD shrinkage agrees very well with the observations from experiments 1 and 2 when we use the tabulated  $\text{H}_2\text{SO}_4$  chemical potential from Giauque *et al.* (1960) in combination with the pure-liquid saturation vapour pressure from the N-K-L parameterisation, Eq. (11). However, when we use the pure-liquid saturation vapour pressure parameterisation from the Aspen Plus Databank, the modelled particles evaporate earlier (at higher RH) than the observed particles. This due to ASPEN parameterisation which gives higher saturation vapour pressures compared to N-K-L parameterization.

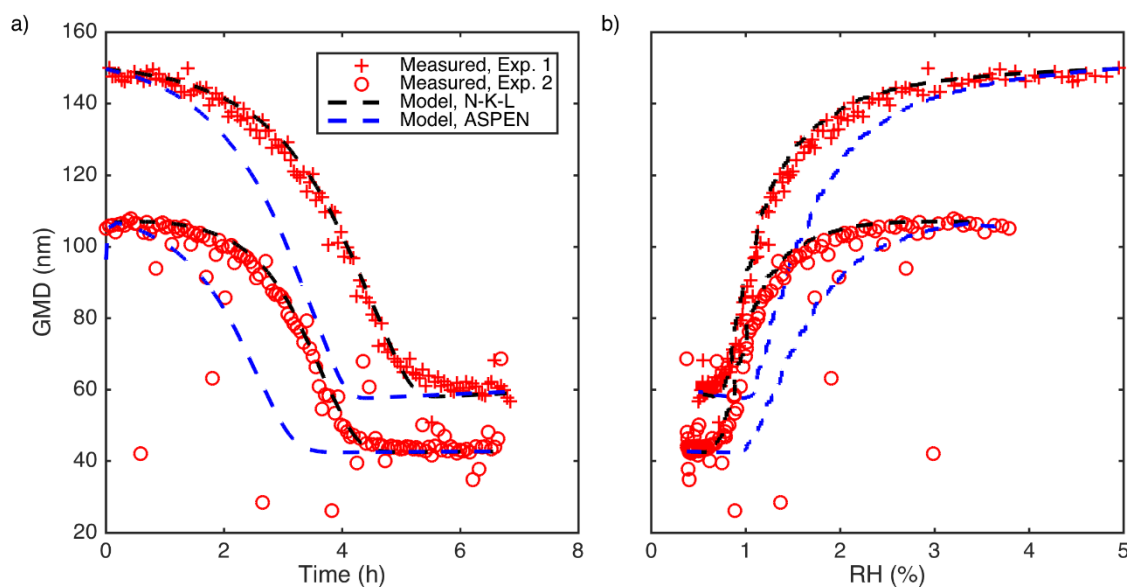

Figure S11. Measured and modelled GMD evolution as a function of (a) time and (b) RH for experiments 1 and 2 performed at  $T=288.8$  K. The modelled particles are composed of S(VI),  $\text{H}_2\text{O}$  and non-volatile, non-water-soluble organics as a particle phase contaminant for Case 1 (see Supplement, Table S1, simulations 5, 12, 19 and 24). The pure liquid saturation vapour pressure of  $\text{H}_2\text{SO}_4$  is calculated with Eq. (11), N-K-L parameterisation or with parameterisation from the Aspen Plus Databank. The  $\text{H}_2\text{SO}_4$  activity is calculated with Eq. (15) using the tabulated chemical potentials from Giauque et al. (1960).

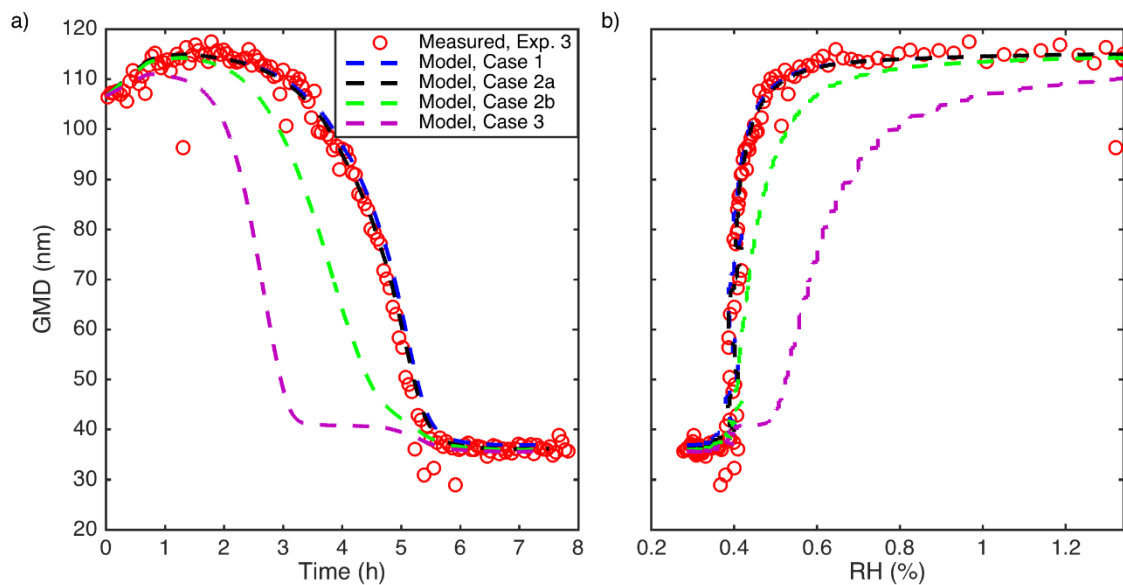

Figure S12. Measured and modelled GMD evolution as a function of (a) time and (b) RH for experiment 3 performed at a temperature range from 268 K to 293 K. The modelled particles are composed of S(VI), H<sub>2</sub>O and NH<sub>3</sub> as a particle phase contaminant. The simulations correspond to Case 1,  $K_{H_2SO_4} = 3.80 \cdot 10^9 \text{ mol} \cdot \text{kg}^{-1}$ , Case 2a,  $K_{H_2SO_4} = 4.00 \cdot 10^9$  and  ${}^xK_{SO_3} = 4.55 \cdot 10^{10}$ , Case 2b,  $K_{H_2SO_4} = 5.00 \cdot 10^9$  and  ${}^xK_{SO_3} = 5.00 \cdot 10^9$  and Case 3,  $K_{H_2SO_4} = 1.00 \cdot 10^{11}$  and  ${}^xK_{SO_3} = 5.00 \cdot 10^7$  (see Supplement, Table S1, simulations 50-53). The pure liquid vapour pressures of H<sub>2</sub>SO<sub>4</sub> and SO<sub>3</sub> are taken from Que et al., (2011) (original source Aspen Plus Databank).

10

15

## Supplementary references

- Dawson, B. S. W., Irish, D. E., and Toogood, G. E.: Vibrational spectral studies of solutions at elevated temperatures and pressures. 8. A Raman spectral study of ammonium hydrogen sulfate solutions and the hydrogen sulfate–sulfate equilibrium, *The Journal of Physical Chemistry*, 90 (2), 334–341, 1986.
- 5 Giauque, W. F., Hornung, E. W., Kunzler, J. E., and Rubin, T. R.: The thermodynamic properties of aqueous sulphuric acid solutions from 15 to 300 K, *J. Am. Chem. Soc.*, 82, 62–70, 1960.
- Kulmala, M. and Laaksonen, A.: Binary nucleation of water–sulfuric acid system: Comparison of classical theories with different H<sub>2</sub>SO<sub>4</sub> saturation vapor pressures, *J. Chem. Phys.*, 93, 696–701, 1990.
- Massoli, P., Lambe, A. T., Ahern, A. T., Williams, L. R., Ehn, M., Mikkilä, J., Canagaratna, M. R., Brune, W. H., Onasch, T.
- 10 B., Jayne, J. T., Petaja, T., Kulmala, M., Laaksonen, A., Kolb, C. E., Davidovits, P., and Worsnop, D. R.: Relationship between aerosol oxidation level and hygroscopic properties of laboratory generated secondary organic aerosol (SOA) particles, *Geophys. Res. Lett.*, 37, 5, L24801, 2010.
- Myhre, C. E. L., Christensen, D. H., Nicolaisen, F. M., Nielsen, C. J. Spectroscopic Study of Aqueous H<sub>2</sub>SO<sub>4</sub> at Different Temperatures and Compositions: Variations in Dissociation and Optical Properties. *J. Phys. Chem. A*, 107, 1979–1991, 2003.
- 15 Nickless, G.: Ed. "Inorganic Sulfur Chemistry", Elsevier, Amsterdam, 1968.
- Noppel, M., H. Vehkamäki, and M. Kulmala, An improved model for hydrate formation in sulfuric–acid water nucleation, *J. Chem. Phys.*, 116, 218–228, 2002.
- Petters, M. D. and Kreidenweis, S. M.: A single parameter representation of hygroscopic growth and cloud condensation nucleus activity, *Atmos. Chem. Phys.*, 7, 1961–1971, 2007.
- 20 Que, H., Song, Y., and Chen, C.: Thermodynamic modeling of the sulfuric acid–water–sulfur trioxide system with the symmetric Electrolyte NRTL model. *J. Chem. Eng. Data*, 56, 963–977, 2011.
- Staples, B. R.: Activity and Osmotic Coefficients of Aqueous Sulfuric Acid at 298.15 K, *J. Phys. Chem. Ref. Data*, 10, 779–798, 1981.
- Sullivan, R. C., Petters, M. D., DeMott, P. J., Kreidenweis, S. M., Wex, H., Niedermeier, D., Hartmann, S., Clauss, T.,
- 25 Stratmann, F., Reitz, P., Schneider, J., and Sierau, B.: Irreversible loss of ice nucleation active sites in mineral dust particles caused by sulphuric acid condensation, *Atmos. Chem. Phys.*, 10, 11471–11487, 2010.
- Topping, D. O., McFiggans, G. B., and Coe, H.: A curved multicomponent aerosol hygroscopicity model framework: Part 2–Including organic compounds, *Atmos. Chem. Phys.*, 5, 1223–1242, 2005.
- Zuend, A., Marcolli C., Booth, A. M., Lienhard, D. M., Soonsin, V., Krieger, U. K., Topping, D. O., McFiggans G., Peter, T.,
- 30 and Seinfeld, J. H.: New and extended parameterization of the thermodynamic model AIOMFAC: calculation of activity coefficients for organic–inorganic mixtures containing carboxyl, hydroxyl, carbonyl, ether, ester, alkenyl, alkyl, and aromatic functional groups, *Atmos. Chem. Phys.*, 11, 9155–9206, 2011.
